# Supplementary material
Source: publisher figshare collection journal article supplement (https://rs.figshare.com/ndownloader/files/14871068)
Supplement: Supplementary file 1 [file 14871068]

## Sheet: Sheet1
SampleID	nsti_score	Qiita_studyID	sample_type	preservative	captive_wild	life_stage	country	specific location	common_name	hematophagous	Taxonomy_Phylum	Taxonomy_Class	Taxonomy_Order	Taxonomy_Family	Taxonomy_Genus	Taxonomy_Species
11166.UM.24869.vfinch	0.0741999	11933	fecal	etoh	wild	adult	Ecuador	Darwin	vampire finch	yes	Chordata	Aves	Passeriformes	Thraupidae	Geospiza	Geospiza septentrionalis
11166.UM.24870.vfinch	0.0474173	11933	fecal	etoh	wild	adult	Ecuador	Darwin	vampire finch	yes	Chordata	Aves	Passeriformes	Thraupidae	Geospiza	Geospiza septentrionalis
11166.UM.24874.vfinch	0.0986432	11933	fecal	etoh	wild	adult	Ecuador	Darwin	vampire finch	yes	Chordata	Aves	Passeriformes	Thraupidae	Geospiza	Geospiza septentrionalis
11166.UM.24877.vfinch	0.0351498	11933	fecal	etoh	wild	adult	Ecuador	Darwin	vampire finch	yes	Chordata	Aves	Passeriformes	Thraupidae	Geospiza	Geospiza septentrionalis
11166.UM.24880.vfinch	0.0305877	11933	fecal	etoh	wild	adult	Ecuador	Darwin	vampire finch	yes	Chordata	Aves	Passeriformes	Thraupidae	Geospiza	Geospiza septentrionalis
11166.UM.24884.vfinch	0.0515614	11933	fecal	etoh	wild	adult	Ecuador	Darwin	vampire finch	yes	Chordata	Aves	Passeriformes	Thraupidae	Geospiza	Geospiza septentrionalis
11166.UM.24888.vfinch	0.0243363	11933	fecal	etoh	wild	adult	Ecuador	Darwin	vampire finch	yes	Chordata	Aves	Passeriformes	Thraupidae	Geospiza	Geospiza septentrionalis
11166.UM.24890.vfinch	0.0599455	11933	fecal	etoh	wild	adult	Ecuador	Darwin	vampire finch	yes	Chordata	Aves	Passeriformes	Thraupidae	Geospiza	Geospiza septentrionalis
11166.UM.24895.vfinch	0.105884	11933	fecal	etoh	wild	adult	Ecuador	Darwin	vampire finch	yes	Chordata	Aves	Passeriformes	Thraupidae	Geospiza	Geospiza septentrionalis
11166.UM.24897.vfinch	0.0730449	11933	fecal	etoh	wild	adult	Ecuador	Darwin	vampire finch	yes	Chordata	Aves	Passeriformes	Thraupidae	Geospiza	Geospiza septentrionalis
11166.UM.24905.vfinch	0.0810866	11933	fecal	etoh	wild	adult	Ecuador	Darwin	vampire finch	yes	Chordata	Aves	Passeriformes	Thraupidae	Geospiza	Geospiza septentrionalis
11166.UM.24913.vfinch	0.0509119	11933	fecal	etoh	wild	adult	Ecuador	Darwin	vampire finch	yes	Chordata	Aves	Passeriformes	Thraupidae	Geospiza	Geospiza septentrionalis
11166.UM.24920.vfinch	0.0311462	11933	fecal	etoh	wild	adult	Ecuador	Darwin	vampire finch	yes	Chordata	Aves	Passeriformes	Thraupidae	Geospiza	Geospiza septentrionalis
11166.UM.24969.vfinch	0.076392	11933	fecal	etoh	wild	adult	Ecuador	Darwin	vampire finch	yes	Chordata	Aves	Passeriformes	Thraupidae	Geospiza	Geospiza septentrionalis
11166.UM.24984.vfinch	0.0489556	11933	fecal	etoh	wild	adult	Ecuador	Darwin	vampire finch	yes	Chordata	Aves	Passeriformes	Thraupidae	Geospiza	Geospiza septentrionalis
11166.UM.24868.finch	0.0453907	11933	fecal	etoh	wild	adult	Ecuador	Genovesa	Genovesa ground finch	no	Chordata	Aves	Passeriformes	Thraupidae	Geospiza	Geospiza acutirostris
11166.UM.24892.finch	0.11064	11933	fecal	etoh	wild	adult	Ecuador	Genovesa	Genovesa ground finch	no	Chordata	Aves	Passeriformes	Thraupidae	Geospiza	Geospiza acutirostris
11166.UM.24894.finch	0.0460564	11933	fecal	etoh	wild	adult	Ecuador	Genovesa	Genovesa ground finch	no	Chordata	Aves	Passeriformes	Thraupidae	Geospiza	Geospiza acutirostris
11166.UM.24943.finch	0.0946289	11933	fecal	etoh	wild	adult	Ecuador	Genovesa	Genovesa ground finch	no	Chordata	Aves	Passeriformes	Thraupidae	Geospiza	Geospiza acutirostris
11166.UM.24951.finch	0.0557274	11933	fecal	etoh	wild	adult	Ecuador	Genovesa	Genovesa ground finch	no	Chordata	Aves	Passeriformes	Thraupidae	Geospiza	Geospiza acutirostris
11166.UM.24976.finch	0.0526519	11933	fecal	etoh	wild	adult	Ecuador	Genovesa	Genovesa ground finch	no	Chordata	Aves	Passeriformes	Thraupidae	Geospiza	Geospiza acutirostris
11166.UM.24981.finch	0.0325885	11933	fecal	etoh	wild	adult	Ecuador	Genovesa	Genovesa ground finch	no	Chordata	Aves	Passeriformes	Thraupidae	Geospiza	Geospiza acutirostris
11166.UM.25005.finch	0.0679151	11933	fecal	etoh	wild	adult	Ecuador	Genovesa	Genovesa ground finch	no	Chordata	Aves	Passeriformes	Thraupidae	Geospiza	Geospiza acutirostris
11166.UM.25009.finch	0.0222755	11933	fecal	etoh	wild	adult	Ecuador	Genovesa	Genovesa ground finch	no	Chordata	Aves	Passeriformes	Thraupidae	Geospiza	Geospiza acutirostris
11166.UM.25010.finch	0.0716929	11933	fecal	etoh	wild	adult	Ecuador	Genovesa	Genovesa ground finch	no	Chordata	Aves	Passeriformes	Thraupidae	Geospiza	Geospiza acutirostris
11166.UM.24896.finch	0.110056	11933	fecal	etoh	wild	adult	Ecuador	Pinta	sharpbeaked ground finch	no	Chordata	Aves	Passeriformes	Thraupidae	Geospiza	Geospiza difficilis
11166.UM.24898.finch	0.0821586	11933	fecal	etoh	wild	adult	Ecuador	Pinta	sharpbeaked ground finch	no	Chordata	Aves	Passeriformes	Thraupidae	Geospiza	Geospiza difficilis
11166.UM.24917.finch	0.0420436	11933	fecal	etoh	wild	adult	Ecuador	Pinta	sharpbeaked ground finch	no	Chordata	Aves	Passeriformes	Thraupidae	Geospiza	Geospiza difficilis
11166.UM.24982.finch	0.0382115	11933	fecal	etoh	wild	adult	Ecuador	Pinta	sharpbeaked ground finch	no	Chordata	Aves	Passeriformes	Thraupidae	Geospiza	Geospiza difficilis
11166.UM.24985.finch	0.0625936	11933	fecal	etoh	wild	adult	Ecuador	Pinta	sharpbeaked ground finch	no	Chordata	Aves	Passeriformes	Thraupidae	Geospiza	Geospiza difficilis
11166.UM.24994.finch	0.0808851	11933	fecal	etoh	wild	adult	Ecuador	Pinta	sharpbeaked ground finch	no	Chordata	Aves	Passeriformes	Thraupidae	Geospiza	Geospiza difficilis
11166.UM.25011.finch	0.0510014	11933	fecal	etoh	wild	adult	Ecuador	Pinta	sharpbeaked ground finch	no	Chordata	Aves	Passeriformes	Thraupidae	Geospiza	Geospiza difficilis
11166.UM.24871.vfinch	0.0487017	11933	fecal	etoh	wild	adult	Ecuador	Wolf	vampire finch	yes	Chordata	Aves	Passeriformes	Thraupidae	Geospiza	Geospiza septentrionalis
11166.UM.24872.vfinch	0.0452711	11933	fecal	etoh	wild	adult	Ecuador	Wolf	vampire finch	yes	Chordata	Aves	Passeriformes	Thraupidae	Geospiza	Geospiza septentrionalis
11166.UM.24875.vfinch	0.0458721	11933	fecal	etoh	wild	adult	Ecuador	Wolf	vampire finch	yes	Chordata	Aves	Passeriformes	Thraupidae	Geospiza	Geospiza septentrionalis
11166.UM.24883.vfinch	0.0399262	11933	fecal	etoh	wild	adult	Ecuador	Wolf	vampire finch	yes	Chordata	Aves	Passeriformes	Thraupidae	Geospiza	Geospiza septentrionalis
11166.UM.24885.vfinch	0.0424486	11933	fecal	etoh	wild	adult	Ecuador	Wolf	vampire finch	yes	Chordata	Aves	Passeriformes	Thraupidae	Geospiza	Geospiza septentrionalis
11166.UM.24891.vfinch	0.0312751	11933	fecal	etoh	wild	adult	Ecuador	Wolf	vampire finch	yes	Chordata	Aves	Passeriformes	Thraupidae	Geospiza	Geospiza septentrionalis
11166.UM.24893.vfinch	0.0393481	11933	fecal	etoh	wild	adult	Ecuador	Wolf	vampire finch	yes	Chordata	Aves	Passeriformes	Thraupidae	Geospiza	Geospiza septentrionalis
11166.UM.24899.vfinch	0.0526123	11933	fecal	etoh	wild	adult	Ecuador	Wolf	vampire finch	yes	Chordata	Aves	Passeriformes	Thraupidae	Geospiza	Geospiza septentrionalis
11166.UM.24900.vfinch	0.0611609	11933	fecal	etoh	wild	adult	Ecuador	Wolf	vampire finch	yes	Chordata	Aves	Passeriformes	Thraupidae	Geospiza	Geospiza septentrionalis
11166.UM.24925.vfinch	0.0742293	11933	fecal	etoh	wild	adult	Ecuador	Wolf	vampire finch	yes	Chordata	Aves	Passeriformes	Thraupidae	Geospiza	Geospiza septentrionalis
1734.LD.Artlit1	0.0397067	1734	fecal	unknown	wild	unknown	Belize	Lamanai	Great Fruiteating Bat	no	Chordata	Mammalia	Chiroptera	Phyllostomidae	Artibeus	Artibeus lituratus
1734.LD.NBS1081E	0.0147851	1734	fecal	unknown	wild	unknown	Belize	Lamanai	Great Fruiteating Bat	no	Chordata	Mammalia	Chiroptera	Phyllostomidae	Artibeus	Artibeus lituratus
1734.LD.NBS1067E	0.00982275	1734	fecal	unknown	wild	unknown	Belize	Lamanai	Jamaican Fruiteating Bat	no	Chordata	Mammalia	Chiroptera	Phyllostomidae	Artibeus	Artibeus jamaicensis
1734.LD.NBS1049B	0.012028	1734	fecal	unknown	wild	unknown	Belize	Lamanai	Pygmy Fruiteating Bat	no	Chordata	Mammalia	Chiroptera	Phyllostomidae	Artibeus	Artibeus phaeotis
1734.LD.QCAZ.M51309	0.030357	1734	fecal	unknown	wild	unknown	Ecuador	Sarayacu	Silver Fruiteating Bat	no	Chordata	Mammalia	Chiroptera	Phyllostomidae	Artibeus	Artibeus glaucus
1734.LD.QCAZ.M50991	0.0497442	1734	fecal	unknown	wild	unknown	Ecuador	Sarayacu	Silky Shorttailed Bat	no	Chordata	Mammalia	Chiroptera	Phyllostomidae	Carollia	Carollia brevicauda
1734.LD.Carsow1	0.0841926	1734	fecal	unknown	wild	unknown	Belize	Lamanai	Sowells Shorttailed Bat	no	Chordata	Mammalia	Chiroptera	Phyllostomidae	Carollia	Carollia sowelli
1734.LD.NBS1083E	0.029062	1734	fecal	unknown	wild	unknown	Belize	Lamanai	Sowells Shorttailed Bat	no	Chordata	Mammalia	Chiroptera	Phyllostomidae	Carollia	Carollia sowelli
1734.LD.QCAZ.M50993	0.0334968	1734	fecal	unknown	wild	unknown	Ecuador	Sarayacu	Lesser Longtailed Bat	no	Chordata	Mammalia	Chiroptera	Phyllostomidae	Choeroniscus	Choeroniscus minor
1734.LD.QCAZ.M51307	0.0105818	1734	fecal	unknown	wild	unknown	Ecuador	Sarayacu	Lesser Longtailed Bat	no	Chordata	Mammalia	Chiroptera	Phyllostomidae	Choeroniscus	Choeroniscus minor
1734.LD.DTS1230	0.00757815	1734	fecal	unknown	wild	unknown	Ecuador	Pa'acocha	Woolly False Vampire Bat	no	Chordata	Mammalia	Chiroptera	Phyllostomidae	Chrotopterus	Chrotopterus auritus
1734.LD.NBS1053E	0.0399874	1734	fecal	unknown	wild	unknown	Belize	Lamanai	Common Vampire Bat	yes	Chordata	Mammalia	Chiroptera	Phyllostomidae	Desmodus	Desmodus rotundus
1734.LD.DTS1222	0.0329593	1734	fecal	unknown	wild	unknown	Ecuador	Pa'acocha	Pallass Longtongued Bat	no	Chordata	Mammalia	Chiroptera	Phyllostomidae	Glossophaga	Glossophaga soricina
1734.LD.DTS1224	0.0149558	1734	fecal	unknown	wild	unknown	Ecuador	Pa'acocha	Pallass Longtongued Bat	no	Chordata	Mammalia	Chiroptera	Phyllostomidae	Glossophaga	Glossophaga soricina
1734.LD.Glosor1	0.0108732	1734	fecal	unknown	wild	unknown	Belize	Lamanai	Pallass Longtongued Bat	no	Chordata	Mammalia	Chiroptera	Phyllostomidae	Glossophaga	Glossophaga soricina
1734.LD.Glosor2	0.0647897	1734	fecal	unknown	wild	unknown	Belize	Lamanai	Pallass Longtongued Bat	no	Chordata	Mammalia	Chiroptera	Phyllostomidae	Glossophaga	Glossophaga soricina
1734.BD.NBS1059	0.0642878	1734	fecal	unknown	wild	adult	Belize	Lamanai	Daviss Round Eared Bat	no	Chordata	Mammalia	Chiroptera	Phyllostomidae	Lophostoma	Lophostoma evotis
1734.LD.DTS1221	0.0218861	1734	fecal	unknown	wild	unknown	Ecuador	Pa'acocha	Pygmy Roundeared Bat	no	Chordata	Mammalia	Chiroptera	Phyllostomidae	Lophostoma	Lophostoma brasiliense
1734.BD.NBS1054	0.0882274	1734	fecal	unknown	wild	adult	Belize	Lamanai	Common Bigeared Bat	no	Chordata	Mammalia	Chiroptera	Phyllostomidae	Micronycteris	Micronycteris microtis
1734.LD.NBS1054E	0.0616399	1734	fecal	unknown	wild	unknown	Belize	Lamanai	Common Bigeared Bat	no	Chordata	Mammalia	Chiroptera	Phyllostomidae	Micronycteris	Micronycteris microtis
1734.LD.NBS1074E	0.0353285	1734	fecal	unknown	wild	unknown	Belize	Lamanai	Yellowthroated Bigeared Bat	no	Chordata	Mammalia	Chiroptera	Phyllostomidae	Micronycteris	Micronycteris brachyotis
1734.LD.QCAZ.M50990	0.00968782	1734	fecal	unknown	wild	unknown	Ecuador	Sarayacu	Hairy Yellowshouldered Bat	no	Chordata	Mammalia	Chiroptera	Phyllostomidae	Sturnira	Sturnira erythromos
1734.LD.QCAZ.M51303	0.0135463	1734	fecal	unknown	wild	unknown	Ecuador	Sarayacu	Hairy Yellowshouldered Bat	no	Chordata	Mammalia	Chiroptera	Phyllostomidae	Sturnira	Sturnira erythromos
1734.BD.ERD503	0.0514486	1734	fecal	unknown	wild	adult	Belize	Lamanai	Little Yellowshouldered Bat	no	Chordata	Mammalia	Chiroptera	Phyllostomidae	Sturnira	Sturnira lilium
1734.BD.ERD504	0.101185	1734	fecal	unknown	wild	unknown	Belize	Lamanai	Little Yellowshouldered Bat	no	Chordata	Mammalia	Chiroptera	Phyllostomidae	Sturnira	Sturnira lilium
1734.BD.ERD510	0.0124422	1734	fecal	unknown	wild	unknown	Belize	Lamanai	Little Yellowshouldered Bat	no	Chordata	Mammalia	Chiroptera	Phyllostomidae	Sturnira	Sturnira lilium
1734.LD.NBS1047C	0.0128848	1734	fecal	unknown	wild	unknown	Belize	Lamanai	Little Yellowshouldered Bat	no	Chordata	Mammalia	Chiroptera	Phyllostomidae	Sturnira	Sturnira lilium
1734.LD.Sl1	0.0271302	1734	fecal	unknown	wild	unknown	Belize	Lamanai	Little Yellowshouldered Bat	no	Chordata	Mammalia	Chiroptera	Phyllostomidae	Sturnira	Sturnira lilium
1734.LD.Stulil2	0.0540113	1734	fecal	unknown	wild	unknown	Belize	Lamanai	Little Yellowshouldered Bat	no	Chordata	Mammalia	Chiroptera	Phyllostomidae	Sturnira	Sturnira lilium
1734.BD.ERD501	0.0189962	1734	fecal	unknown	wild	adult	Belize	Lamanai	Fringelipped Bat	no	Chordata	Mammalia	Chiroptera	Phyllostomidae	Trachops	Trachops cirrhosus
1734.LD.NBS1060E	0.0575878	1734	fecal	unknown	wild	unknown	Belize	Lamanai	Fringelipped Bat	no	Chordata	Mammalia	Chiroptera	Phyllostomidae	Trachops	Trachops cirrhosus
1734.LD.Urobil1	0.0106265	1734	fecal	unknown	wild	unknown	Belize	Lamanai	Tentmaking Bat	no	Chordata	Mammalia	Chiroptera	Phyllostomidae	Uroderma	Uroderma bilobatum
1734.BD.ERD502	0.0265886	1734	fecal	unknown	wild	adult	Belize	Lamanai	Northern Little Yelloweared Bat	no	Chordata	Mammalia	Chiroptera	Phyllostomidae	Vampyressa	Vampyressa thyone
11166.vbat.J4.anal.bat	0.0417993	11933	anal	freezing	wild	adult	Mexico	Veracruz	Mexican fruit bat	no	Chordata	Mammalia	Chiroptera	Phyllostomidae	Artibeus	Artibeus jamaicensis
11166.vbat.DR07.colon.vbat	0.0305287	11933	colon	freezing	wild	adult	Mexico	Morelos	common vampire bat	yes	Chordata	Mammalia	Chiroptera	Phyllostomidae	Desmodus	Desmodus rotundus
11166.vbat.DR09.colon.vbat	0.0335318	11933	colon	freezing	wild	adult	Mexico	Morelos	common vampire bat	yes	Chordata	Mammalia	Chiroptera	Phyllostomidae	Desmodus	Desmodus rotundus
11166.vbat.DR1.anal.vbat	0.0368247	11933	anal	freezing	wild	adult	Mexico	Veracruz	common vampire bat	yes	Chordata	Mammalia	Chiroptera	Phyllostomidae	Desmodus	Desmodus rotundus
11166.vbat.DR10.colon.vbat	0.0282294	11933	colon	freezing	wild	adult	Mexico	Morelos	common vampire bat	yes	Chordata	Mammalia	Chiroptera	Phyllostomidae	Desmodus	Desmodus rotundus
11166.vbat.DR11.colon.vbat	0.0222739	11933	colon	freezing	wild	adult	Mexico	Morelos	common vampire bat	yes	Chordata	Mammalia	Chiroptera	Phyllostomidae	Desmodus	Desmodus rotundus
11166.vbat.DR12.colon.vbat	0.027096	11933	colon	freezing	wild	adult	Mexico	Morelos	common vampire bat	yes	Chordata	Mammalia	Chiroptera	Phyllostomidae	Desmodus	Desmodus rotundus
11166.vbat.DR14.colon.vbat	0.0068851	11933	colon	freezing	wild	adult	Mexico	Morelos	common vampire bat	yes	Chordata	Mammalia	Chiroptera	Phyllostomidae	Desmodus	Desmodus rotundus
11166.vbat.DR15.colon.vbat	0.0293396	11933	colon	freezing	wild	adult	Mexico	Morelos	common vampire bat	yes	Chordata	Mammalia	Chiroptera	Phyllostomidae	Desmodus	Desmodus rotundus
11166.vbat.DR16.colon.vbat	0.0313687	11933	colon	freezing	wild	adult	Mexico	Morelos	common vampire bat	yes	Chordata	Mammalia	Chiroptera	Phyllostomidae	Desmodus	Desmodus rotundus
11166.vbat.DR17.colon.vbat	0.0356432	11933	colon	freezing	wild	adult	Mexico	Morelos	common vampire bat	yes	Chordata	Mammalia	Chiroptera	Phyllostomidae	Desmodus	Desmodus rotundus
11166.vbat.DR18.colon.vbat	0.0340599	11933	colon	freezing	wild	adult	Mexico	Morelos	common vampire bat	yes	Chordata	Mammalia	Chiroptera	Phyllostomidae	Desmodus	Desmodus rotundus
11166.vbat.DR19.colon.vbat	0.0125166	11933	colon	freezing	wild	adult	Mexico	Morelos	common vampire bat	yes	Chordata	Mammalia	Chiroptera	Phyllostomidae	Desmodus	Desmodus rotundus
11166.vbat.DR2.anal.vbat	0.0402502	11933	anal	freezing	wild	juvenile	Mexico	Veracruz	common vampire bat	yes	Chordata	Mammalia	Chiroptera	Phyllostomidae	Desmodus	Desmodus rotundus
11166.vbat.DR20.colon.vbat	0.0269495	11933	colon	freezing	wild	adult	Mexico	Morelos	common vampire bat	yes	Chordata	Mammalia	Chiroptera	Phyllostomidae	Desmodus	Desmodus rotundus
11166.vbat.DR21.colon.vbat	0.0345034	11933	colon	freezing	wild	adult	Mexico	Morelos	common vampire bat	yes	Chordata	Mammalia	Chiroptera	Phyllostomidae	Desmodus	Desmodus rotundus
11166.vbat.DR25.colon.vbat	0.036232	11933	colon	freezing	wild	adult	Mexico	Morelos	common vampire bat	yes	Chordata	Mammalia	Chiroptera	Phyllostomidae	Desmodus	Desmodus rotundus
11166.vbat.DR26.colon.vbat	0.0541484	11933	colon	freezing	wild	adult	Mexico	Morelos	common vampire bat	yes	Chordata	Mammalia	Chiroptera	Phyllostomidae	Desmodus	Desmodus rotundus
11166.vbat.DR27.colon.vbat	0.042795	11933	colon	freezing	wild	adult	Mexico	Morelos	common vampire bat	yes	Chordata	Mammalia	Chiroptera	Phyllostomidae	Desmodus	Desmodus rotundus
11166.vbat.DR28.colon.vbat	0.0250864	11933	colon	freezing	wild	adult	Mexico	Morelos	common vampire bat	yes	Chordata	Mammalia	Chiroptera	Phyllostomidae	Desmodus	Desmodus rotundus
11166.vbat.DR3.anal.vbat	0.0426105	11933	anal	freezing	wild	juvenile	Mexico	Veracruz	common vampire bat	yes	Chordata	Mammalia	Chiroptera	Phyllostomidae	Desmodus	Desmodus rotundus
11166.vbat.DR4.anal.vbat	0.0728054	11933	anal	freezing	wild	adult	Mexico	Veracruz	common vampire bat	yes	Chordata	Mammalia	Chiroptera	Phyllostomidae	Desmodus	Desmodus rotundus
11166.vbat.DR5.anal.vbat	0.027823	11933	anal	freezing	wild	adult	Mexico	Veracruz	common vampire bat	yes	Chordata	Mammalia	Chiroptera	Phyllostomidae	Desmodus	Desmodus rotundus
11166.vbat.J3.anal.bat	0.0192684	11933	anal	freezing	wild	adult	Mexico	Veracruz	little yellowshouldered bat	no	Chordata	Mammalia	Chiroptera	Phyllostomidae	Sturnira	Sturnira lilium
2338.0623.7.I	0.0111447	2338	fecal	frozen	wild	adult	Costa Rica	La Selva	great fruit-eating bat	no	Chordata	Mammalia	Chiroptera	Phyllostomidae	Artibeus	Artibeus intermedius
2338.0701.13.I	0.0533637	2338	fecal	frozen	wild	subadult	Costa Rica	La Selva	Mexican fruit bat	no	Chordata	Mammalia	Chiroptera	Phyllostomidae	Artibeus	Artibeus jamaicensis
2338.0627.8.I	0.05471	2338	fecal	frozen	wild	adult	Costa Rica	La Selva	chestnut short-tailed bat	no	Chordata	Mammalia	Chiroptera	Phyllostomidae	Carollia	Carollia castanea
2338.0620.8.I	0.0557257	2338	fecal	frozen	wild	subadult	Costa Rica	La Selva	Sebas short-tailed bat	no	Chordata	Mammalia	Chiroptera	Phyllostomidae	Carollia	Carollia perspicillata
2338.0623.9.I	0.0588833	2338	fecal	frozen	wild	adult	Costa Rica	La Selva	Sebas short-tailed bat	no	Chordata	Mammalia	Chiroptera	Phyllostomidae	Carollia	Carollia perspicillata
2338.0627.2.I	0.0256635	2338	fecal	frozen	wild	adult	Costa Rica	La Selva	Sebas short-tailed bat	no	Chordata	Mammalia	Chiroptera	Phyllostomidae	Carollia	Carollia perspicillata
2338.0627.22.I2	0.0101166	2338	fecal	frozen	wild	adult	Costa Rica	La Selva	Sebas short-tailed bat	no	Chordata	Mammalia	Chiroptera	Phyllostomidae	Carollia	Carollia perspicillata
2338.0701.17.I	0.00778587	2338	fecal	frozen	wild	subadult	Costa Rica	La Selva	Sebas short-tailed bat	no	Chordata	Mammalia	Chiroptera	Phyllostomidae	Carollia	Carollia perspicillata
2338.0702.2.I	0.0123882	2338	fecal	frozen	wild	adult	Costa Rica	La Selva	Sebas short-tailed bat	no	Chordata	Mammalia	Chiroptera	Phyllostomidae	Carollia	Carollia perspicillata
2338.0702.7.I	0.0493678	2338	fecal	frozen	wild	adult	Costa Rica	La Selva	Sebas short-tailed bat	no	Chordata	Mammalia	Chiroptera	Phyllostomidae	Carollia	Carollia perspicillata
2338.0702.8.I	0.0269916	2338	fecal	frozen	wild	adult	Costa Rica	La Selva	Sebas short-tailed bat	no	Chordata	Mammalia	Chiroptera	Phyllostomidae	Carollia	Carollia perspicillata
2338.0624.6.I	0.00843775	2338	fecal	frozen	wild	subadult	Costa Rica	La Selva	Sowells short-tailed bat	no	Chordata	Mammalia	Chiroptera	Phyllostomidae	Carollia	Carollia sowelli
11166.USDA.46000	0.0666155	11933	fecal	fta	wild	unknown	Belize	Lamanai	vampire bat	yes	Chordata	Mammalia	Chiroptera	Phyllostomidae	Desmodus	Desmodus rotundus
11166.USDA.46001	0.0431713	11933	fecal	fta	wild	unknown	Belize	Lamanai	vampire bat	yes	Chordata	Mammalia	Chiroptera	Phyllostomidae	Desmodus	Desmodus rotundus
11166.USDA.46002	0.0556137	11933	fecal	fta	wild	unknown	Belize	Lamanai	vampire bat	yes	Chordata	Mammalia	Chiroptera	Phyllostomidae	Desmodus	Desmodus rotundus
11166.USDA.46003	0.0211962	11933	fecal	fta	wild	unknown	Belize	Lamanai	vampire bat	yes	Chordata	Mammalia	Chiroptera	Phyllostomidae	Desmodus	Desmodus rotundus
11166.USDA.46004	0.081925	11933	fecal	fta	wild	unknown	Belize	Lamanai	vampire bat	yes	Chordata	Mammalia	Chiroptera	Phyllostomidae	Desmodus	Desmodus rotundus
11166.USDA.46005	0.0709336	11933	fecal	fta	wild	unknown	Belize	Lamanai	vampire bat	yes	Chordata	Mammalia	Chiroptera	Phyllostomidae	Desmodus	Desmodus rotundus
11166.USDA.46006	0.0600107	11933	fecal	fta	wild	unknown	Belize	Lamanai	vampire bat	yes	Chordata	Mammalia	Chiroptera	Phyllostomidae	Desmodus	Desmodus rotundus
11166.USDA.46007	0.0772442	11933	fecal	fta	wild	unknown	Belize	Lamanai	vampire bat	yes	Chordata	Mammalia	Chiroptera	Phyllostomidae	Desmodus	Desmodus rotundus
11166.USDA.46008	0.0509163	11933	fecal	fta	wild	unknown	Belize	Lamanai	vampire bat	yes	Chordata	Mammalia	Chiroptera	Phyllostomidae	Desmodus	Desmodus rotundus
11166.USDA.46010	0.0229211	11933	fecal	fta	wild	unknown	Belize	Lamanai	vampire bat	yes	Chordata	Mammalia	Chiroptera	Phyllostomidae	Desmodus	Desmodus rotundus
11166.USDA.46011	0.0540407	11933	fecal	fta	wild	unknown	Belize	Lamanai	vampire bat	yes	Chordata	Mammalia	Chiroptera	Phyllostomidae	Desmodus	Desmodus rotundus
11166.USDA.46012	0.0726119	11933	fecal	fta	wild	unknown	Belize	Lamanai	vampire bat	yes	Chordata	Mammalia	Chiroptera	Phyllostomidae	Desmodus	Desmodus rotundus
11166.USDA.46013	0.0274003	11933	fecal	fta	wild	unknown	Belize	Lamanai	vampire bat	yes	Chordata	Mammalia	Chiroptera	Phyllostomidae	Desmodus	Desmodus rotundus
11166.USDA.46014	0.0840947	11933	fecal	fta	wild	unknown	Belize	Lamanai	vampire bat	yes	Chordata	Mammalia	Chiroptera	Phyllostomidae	Desmodus	Desmodus rotundus
11166.USDA.46015	0.0317126	11933	fecal	fta	wild	unknown	Belize	Lamanai	vampire bat	yes	Chordata	Mammalia	Chiroptera	Phyllostomidae	Desmodus	Desmodus rotundus
11166.USDA.46016	0.0653102	11933	fecal	fta	wild	unknown	Belize	Lamanai	vampire bat	yes	Chordata	Mammalia	Chiroptera	Phyllostomidae	Desmodus	Desmodus rotundus
11166.USDA.46021	0.0200485	11933	fecal	fta	wild	unknown	Belize	Lamanai	vampire bat	yes	Chordata	Mammalia	Chiroptera	Phyllostomidae	Desmodus	Desmodus rotundus
11166.USDA.46024	0.050544	11933	fecal	fta	wild	unknown	Belize	Lamanai	vampire bat	yes	Chordata	Mammalia	Chiroptera	Phyllostomidae	Desmodus	Desmodus rotundus
11166.USDA.46027	0.0575569	11933	fecal	fta	wild	unknown	Belize	Lamanai	vampire bat	yes	Chordata	Mammalia	Chiroptera	Phyllostomidae	Desmodus	Desmodus rotundus
11166.USDA.46030	0.0778114	11933	fecal	fta	wild	unknown	Belize	Lamanai	vampire bat	yes	Chordata	Mammalia	Chiroptera	Phyllostomidae	Desmodus	Desmodus rotundus
